# Supplementary material for: Reproducible Bioinformatics Analysis Workflows for Detecting IGH Gene Fusions in B-Cell Acute Lymphoblastic Leukaemia Patients
Source: MDPI journal article supplement (doi:10.3390/cancers15194731), 2023-09-26
Supplement: s1 [file s1]

## Supplementary Data file

### Supplementary Data S1

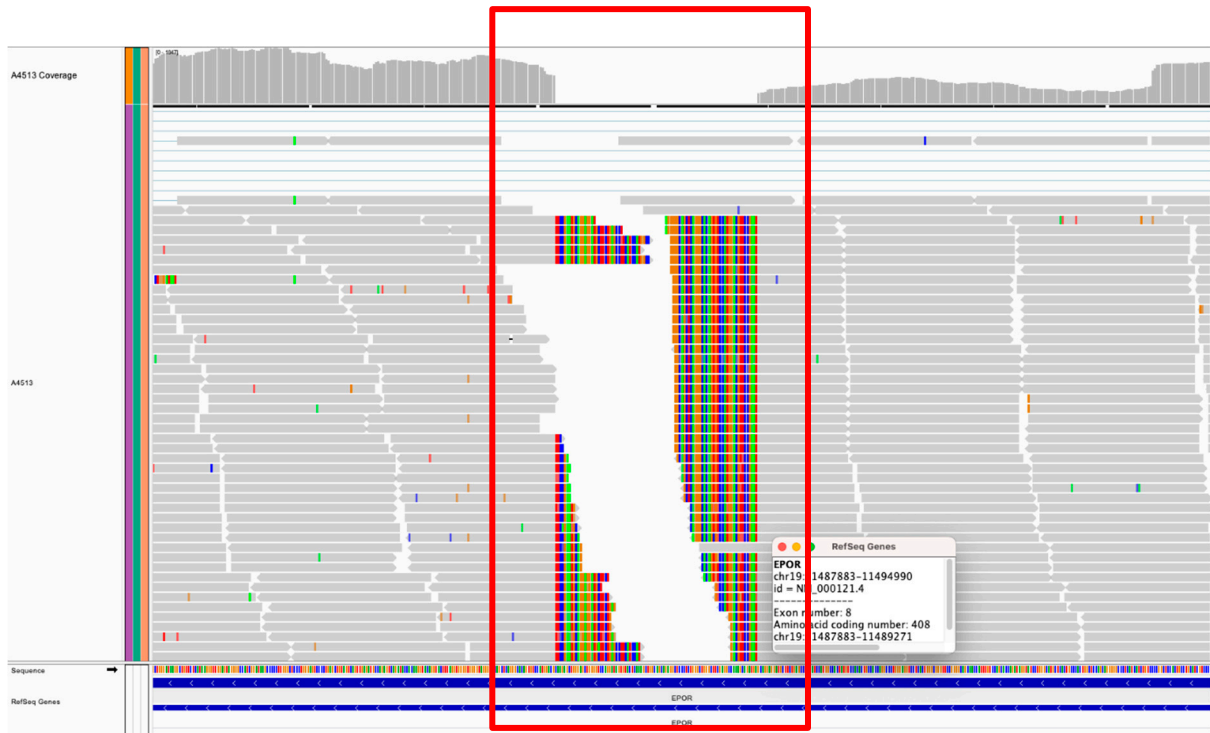

**Identification of *IGH::EPOR* gene fusions.** *IGH::EPOR* fusions were confirmed through inspection of the sequencing reads in the BAM using IGV (Integrative Genomics Viewer). Above you can see the mismatches at the end of the sequencing reads that are mapped to *EPOR*.

## Supplementary Data S2

The default commands used to run the standard pipeline.

| Gene Fusion Detection Algorithm | Version | Alignment algorithm (version)                           | Default parameters                                                                                                                                                                                 |
|---------------------------------|---------|---------------------------------------------------------|----------------------------------------------------------------------------------------------------------------------------------------------------------------------------------------------------|
| Arriba                          | 2.1.0   | STAR (v2.7.9a)                                          | <pre> arriba \ -x /dev/stdin \ -o \${filename}.fusions.tsv \ -O \${filename}.fusions.discarded. tsv \ -a \${assembly} \ -g \${gtf} \ -b \${blacklist} \ -k \${knownfus} \ -p \${proteindom} </pre> |
| FusionCatcher                   | 1.33    | Bowtie (v1.2.3)<br>Bowtie2 (v2.3.5.1)<br>STAR (v2.7.2b) | <pre> fusioncatcher \ -p \${task.cpus} \ -d \${fusioncatcher_db} \ -i \${reads[0]},\${reads[1]} \ -o \\${PWD} \ --skip-blat </pre>                                                                 |
| Star-Fusion                     | 1.10.0  | STAR (v2.7.8)                                           | <pre> STAR-Fusion \ --genome_lib_dir \${ctat_dir} \ --left_fq \${reads[0]} \ --right_fq \${reads[1]} \ --CPU \${task.cpus} \ --output_dir \\${PWD} </pre>                                          |

### Supplementary Data S3

The default and altered values for the parameters used for each test of STAR-Fusion. Results from Read Support (3) and Read Support + FFPM (3) were used for the manuscript as they were the best performing for the given parameter combination.

| Test Name               | Parameter                                                                                                                                                                                                                     | Default Value                                  | Altered Value                                         |
|-------------------------|-------------------------------------------------------------------------------------------------------------------------------------------------------------------------------------------------------------------------------|------------------------------------------------|-------------------------------------------------------|
| Read Support (1)        | --min_novel_junction_support                                                                                                                                                                                                  | 1                                              | 0                                                     |
| Read Support (2)        | --min_junction_reads                                                                                                                                                                                                          | 2                                              | 1                                                     |
| Read Support (3)        | --min_junction_reads<br>--min_novel_junction_support                                                                                                                                                                          | 1<br>2                                         | 0<br>1                                                |
| Read Support + FFPM (1) | --min_novel_junction_support<br>--min_FFPM                                                                                                                                                                                    | 1<br>0.1                                       | 0<br>0.001                                            |
| Read Support + FFPM (2) | --min_junction_reads<br>--min_FFPM                                                                                                                                                                                            | 2<br>0.1                                       | 1<br>0.001                                            |
| Read Support + FFPM (3) | --min_junction_reads<br>--min_novel_junction_support<br>--min_FFPM                                                                                                                                                            | 1<br>2<br>0.1                                  | 0<br>1<br>0.001                                       |
| Max Sensitivity         | --max_sensitivity<br>Includes:<br>--min_junction_reads<br>--min_sum_frags<br>--require_LDAS<br>--min_spanning_frags_only<br>--min_novel_junction_support<br>--skip_FFPM<br>--<br>no_single_fusion_per_breakpoint<br>--skip_EM | <br>1<br>2<br>1<br>5<br>3<br>0.1<br>n/a<br>n/a | <br>0<br>1<br>0<br>1<br>1<br>1<br>n/a<br>TRUE<br>TRUE |
| Full Monty              | --full_Monty<br>Includes --max_sensitivity, and:<br>--max_promiscuity<br>--min_pct_dom_promiscuity<br>--min_alt_pct_junction<br>--no_annotation_filter<br>--no_RT_artifact_filter                                             | <br>10<br>20<br>10.0<br>n/a<br>n/a             | <br>1000000<br>1<br>1e-3<br>TRUE<br>TRUE              |
